# Supplementary material
Source: PubMed Central journal article supplement (PMC3732442)
Supplement: 97320630009690S1.pdf [file 97320630009690S1.pdf]

## Supplementary material:

**Table 1:** Purification of Cardiolipin Synthase from *Mycobacterium phlei*

| Source of enzyme from <i>M.phlei</i>                         | Protein concentration(µg/ml) | Enzyme activity Cls PG pathway µg of CL phosphorous/ml/ minute | Enzyme activity Cls CDP-diacylglycerol pathway µg of CL phosphorous/ml/ minute | Specific activity Cls PG pathway µg of CL phosphorous/mg/ minute | Specific activity Cls CDP-diacylglycerol pathway µg of CL phosphorous/mg/ minute | Km (µM) PG | Km (µM) CDP-diacylglycerol |
|--------------------------------------------------------------|------------------------------|----------------------------------------------------------------|--------------------------------------------------------------------------------|------------------------------------------------------------------|----------------------------------------------------------------------------------|------------|----------------------------|
| Membrane Fraction solubilized with 2M Urea                   | 29                           | 4.5+0.25                                                       | 6.5+0.25                                                                       | 16.7+0.5                                                         | 26.7+0.5                                                                         | 56+0.5     | 2.65+0.05                  |
| 30% (NH <sub>4</sub> ) <sub>2</sub> SO <sub>4</sub> fraction | 18                           | 4.95+0.55                                                      | 7.5+0.35                                                                       | 41.2+1.45                                                        | 60.6+2.25                                                                        | 55.5+0.25  | 2.6+0.05                   |
| Sephacryl S-200                                              | 6.5                          | 10.4+0.25                                                      | 12.5+0.45                                                                      | 189.4+3.25                                                       | 249.4+4.25                                                                       | 56+0.5     | 2.6+0.03                   |
| HPLC-GPC TSK-3000SW                                          | 1.8                          | 11+0.35                                                        | 13+0.45                                                                        | 216.21+0.95                                                      | 286.1+1.05                                                                       | 55+0.05    | 2.56+0.04                  |
| C-18 RP-HPLC                                                 | 1.6                          | 11.5+0.15                                                      | 14+0.35                                                                        | 293.21+1.95                                                      | 350+1.95                                                                         | 55+0.05    | 2.56+0.04                  |

Values are the mean+ SD from three determinations
